# Supplementary material for: Photocatalytic activity enhancement with 4-cyanophenylacetylene-modified Cu2O cubes and rhombic dodecahedra and use in arylboronic acid hydroxylation
Source: Royal Society of Chemistry journal article supplement (doi:10.1039/d3ta04021f), 2023-01-01
Supplement: d3ta04021f1.pdf [file d3ta04021f1.pdf]

## Electronic Supplementary Information

### **Photocatalytic activity enhancement with 4-cyanophenylacetylene-modified Cu<sub>2</sub>O cubes and rhombic dodecahedra and use in arylboronic acid hydroxylation**

Po-Jung Chou,<sup>a</sup> Wei-Yang Yu,<sup>b</sup> Jui-Cheng Kao,<sup>b</sup> Yu-Chieh Lo,<sup>b</sup> Jyh-Pin Chou,<sup>\*c</sup> and Michael H. Huang<sup>\*a</sup>

<sup>a</sup>*Department of Chemistry and Frontier Research Center on Fundamental and Applied Sciences of Matters, National Tsing Hua University, Hsinchu 30013, Taiwan. E-mail: hyhuang@mx.nthu.edu.tw*

<sup>b</sup>*Department of Materials Science and Engineering, National Yang Ming Chiao Tung University, Hsinchu 30010, Taiwan.*

<sup>c</sup>*Department of Physics, National Changhua University of Education, Changhua 50007, Taiwan. E-mail: jpchou@cc.ncue.edu.tw*

#### **Synthesis of Cu<sub>2</sub>O crystals**

All Cu<sub>2</sub>O crystals were synthesized in a 31 °C water bath. For the synthesis of Cu<sub>2</sub>O cubes, 114.6 mL of deionized water was added to a beaker containing 1.044 g of SDS. Next, 1.2 mL of 0.1 M CuCl<sub>2</sub> solution was added into the beaker and kept stirring for 25 min. After that, 2.4 mL of 1 M NaOH solution was introduced and stirred for 5 sec. Finally, 1.8 mL of 0.2 M NH<sub>2</sub>OH·HCl solution was quickly added and stirred for 10 sec. After stop stirring, the solution was aged for 50 min.

To make Cu<sub>2</sub>O octahedra, 26.26 mL of deionized water was added to a sample vial containing 0.348 g of SDS. 0.8 mL of 0.1 M CuCl<sub>2</sub> solution was added into the vial and kept stirring for 25 min. After that, 0.8 mL of 1 M NaOH was introduced and stirred for 3 sec. Finally, 2.6 mL of 0.2 M NH<sub>2</sub>OH·HCl solution was quickly added and stirred for 10 sec. After stop stirring, the solution was aged for 25 min.

To form Cu<sub>2</sub>O rhombic dodecahedra, 27.68 mL of deionized water was added to a sample vial which containing 0.348 g of SDS. Then 2 mL of 0.1 M CuCl<sub>2</sub> solution was added into the vial and kept stirring for 25 min. After that, 0.72 mL of 1M NaOH was added and stirred for 5 sec, then 9.6 mL of 0.1 M NH<sub>2</sub>OH·HCl was quickly added and stirred for 20 sec. After stop stirring, the solution was aged for 50 min.

The solid product was centrifuged at 7500 rpm for 3 min, and washed with 1:1 volume ratio of water and ethanol for 3 times to remove residual chemicals and SDS, and then washed with 95% ethanol once. After washing, the particles were stored in absolute ethanol to avoid oxidation.

#### **Electron paramagnetic resonance spectral measurements**

Commercially available 5,5-dimethyl-1-pyrrolin-N-oxide (DMPO) would cause high

EPR background from impurities. Thus, DMPO needed to be purified before EPR measurements. First, a 1.0 M DMPO solution was prepared by adding 0.2264 g of DMPO to 2 mL of 0.1 M phosphate buffer solution (PBS) to give a solution pH of 7.4 or adding methanol. Then 2 mL of 1.0 M DMPO solution was repeatedly sonicated with activated charcoal and centrifuged for 3 times, and used a syringe filter to remove residual activated charcoal.

After purification of DMPO, each shape of pristine and 4-CNA-modified  $\text{Cu}_2\text{O}$  particles were dispersed in phosphate buffer solution or methanol with a concentration of 1 mg/mL, and 0.1, 0.2 and 0.5 mL of cube, rhombic dodecahedron, and octahedron solutions were added to vials, respectively. Then 0.1 mL of 1.0 M DMPO solution was added to the vials and filled up to 1 mL with phosphate buffer solution or methanol. The reagent amounts are listed in Table S1. The solutions were placed 30 cm from xenon lamp with a long-pass Y-43 cutoff filter between the xenon lamp and vial, and irradiated with stirring for 2 min. Then sent for EPR measurements immediately. The settings of EPR instrument are: center field 3497.7 G, sweep width 100 G, sampling time 20 ms, microwave frequency 9.82 GHz, microwave power 15 mW, receiver gain 30, and receiver time constant 327.7 ms.

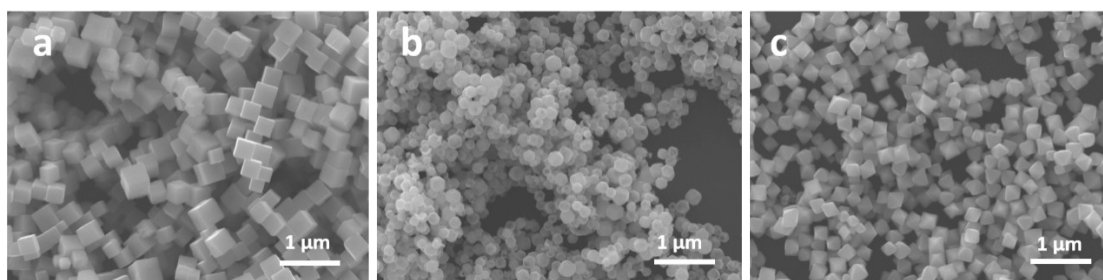

**Fig. S1** SEM images of the synthesized  $\text{Cu}_2\text{O}$  (a) cubes, (b) rhombic dodecahedra, and (c) octahedra.

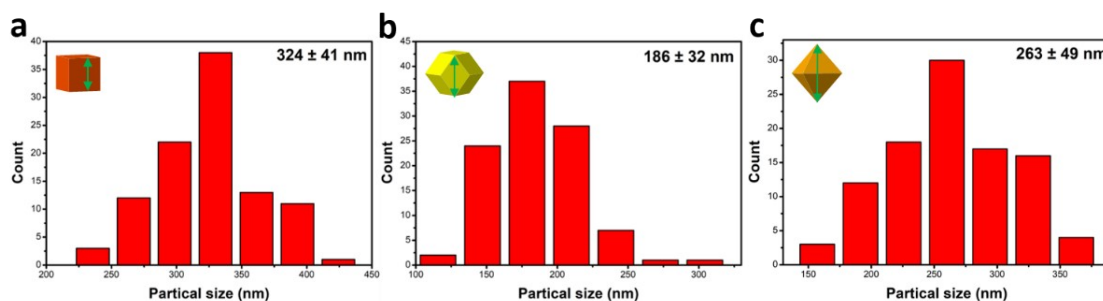

**Fig. S2** Size distribution histograms of synthesized  $\text{Cu}_2\text{O}$  (a) cubes, (b) rhombic dodecahedra, and (c) octahedra.

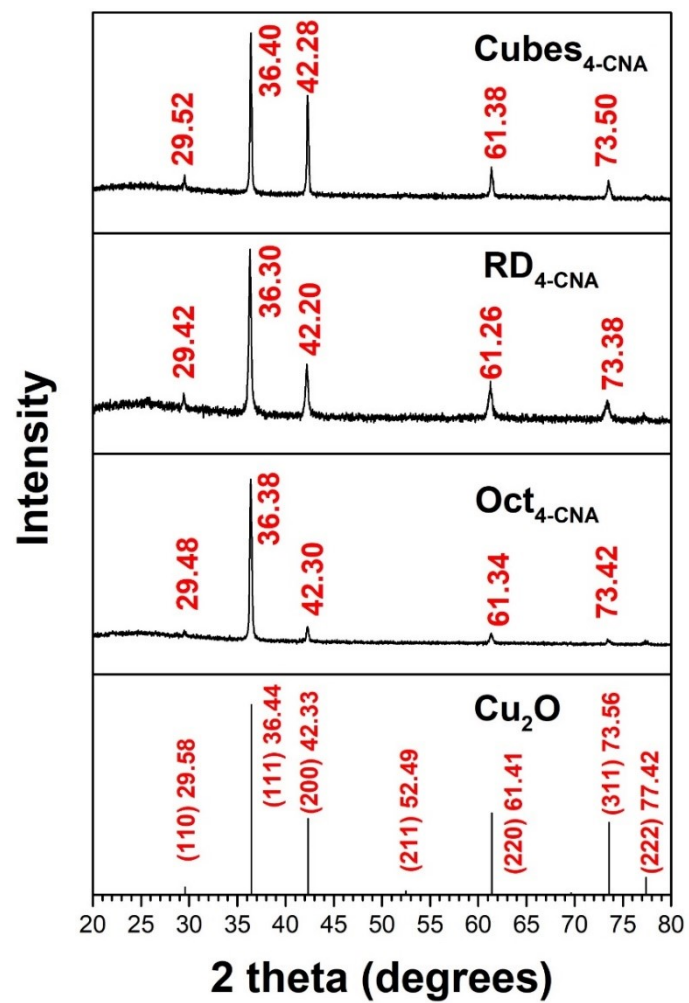

**Fig. S3** XRD patterns of 4-CNA-modified Cu<sub>2</sub>O crystals. Standard XRD pattern of Cu<sub>2</sub>O is also shown.

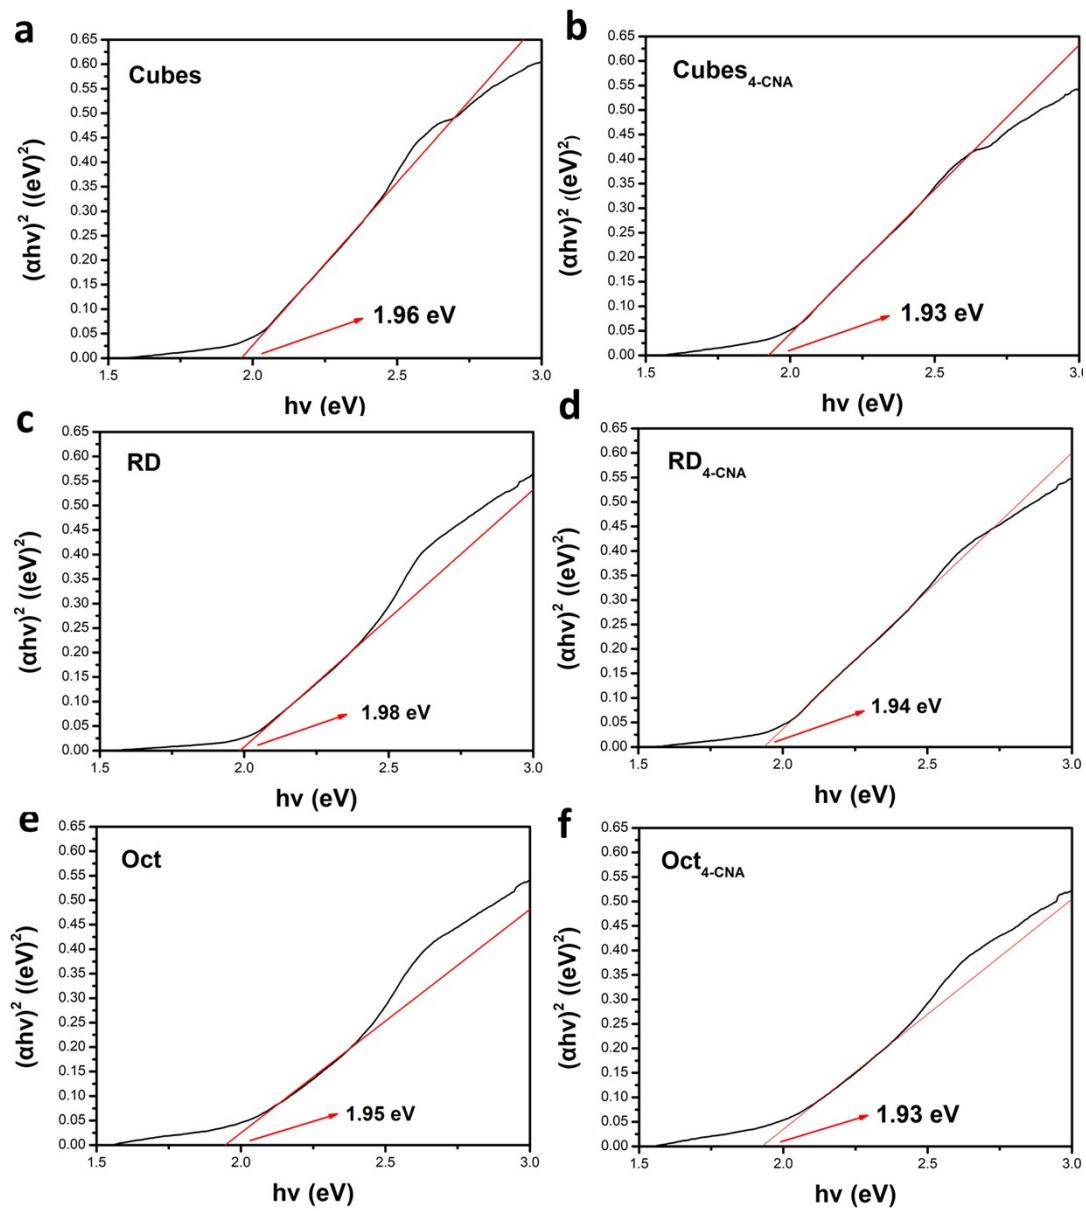

**Fig. S4.** (a–f) Tauc plots of pristine and 4-CNA-functionalized  $\text{Cu}_2\text{O}$  crystals for band gap energy determination.

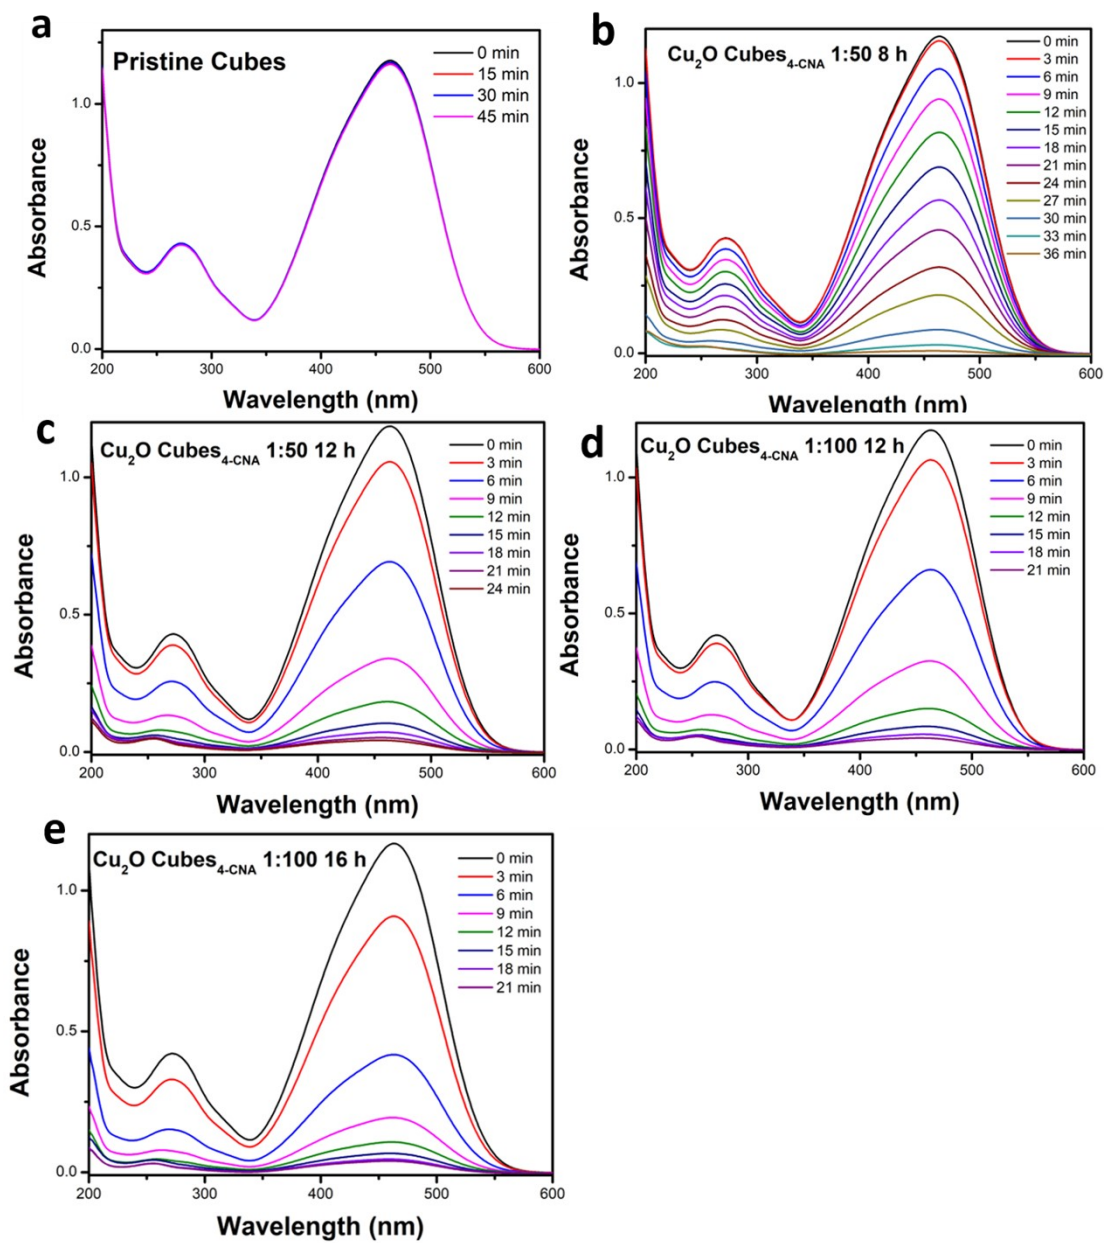

**Fig. S5** Time-dependent UV-vis spectra of methyl orange photodegraded by (a) pristine  $\text{Cu}_2\text{O}$  cubes and (b-e)  $\text{Cu}_2\text{O}$  cubes modified with different 4-CNA molar ratios and functionalization times.

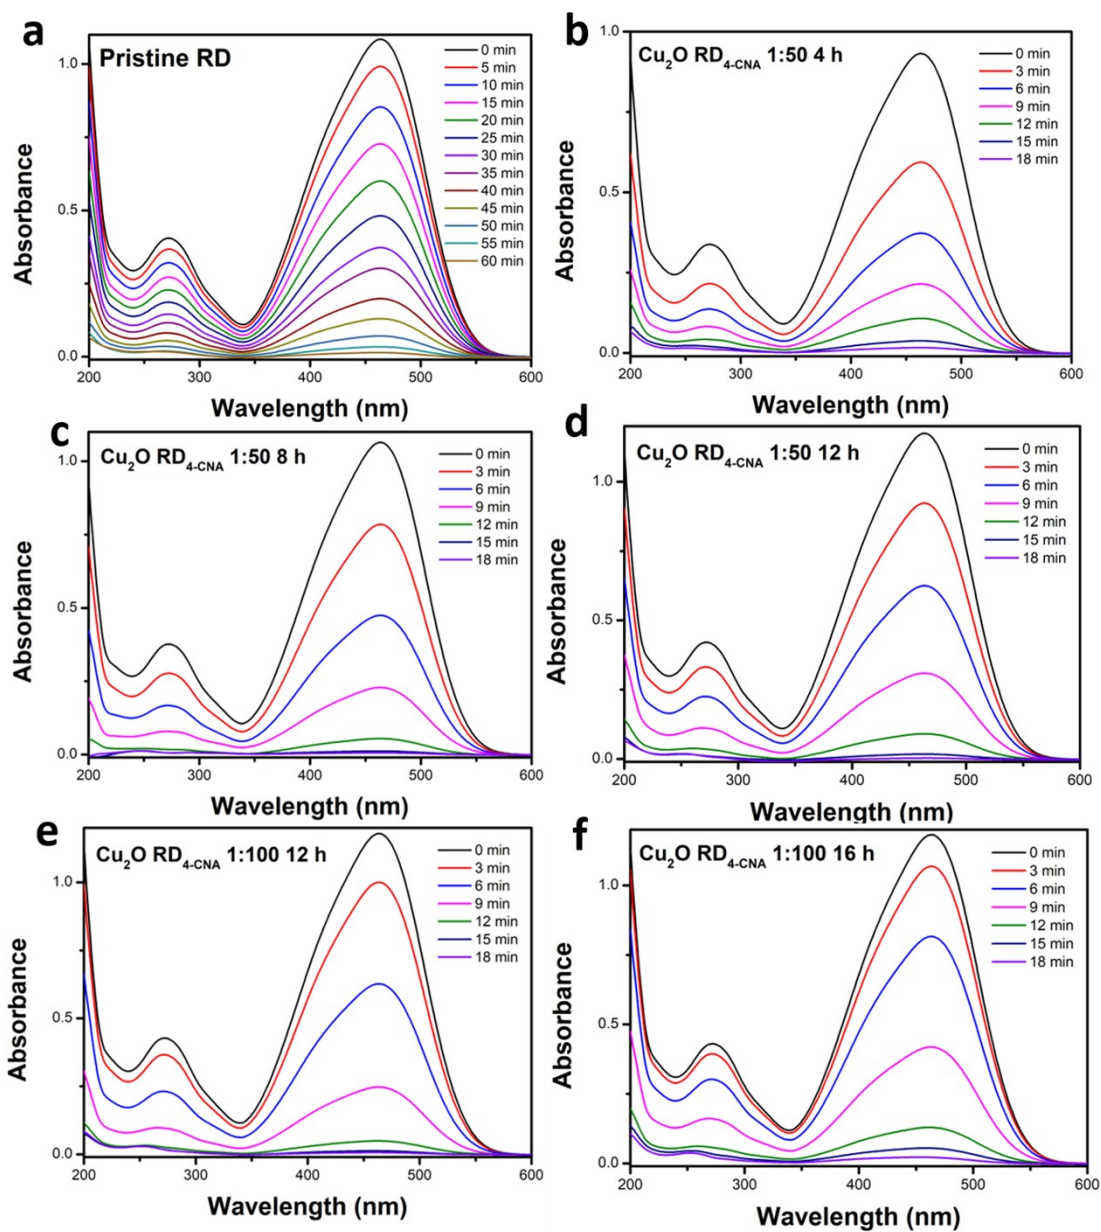

**Fig. S6** Time-dependent UV-vis spectra of methyl orange photodegraded by (a) pristine  $\text{Cu}_2\text{O}$  rhombic dodecahedra and (b–f)  $\text{Cu}_2\text{O}$  rhombic dodecahedra modified with different 4-CNA molar ratios and functionalization times.



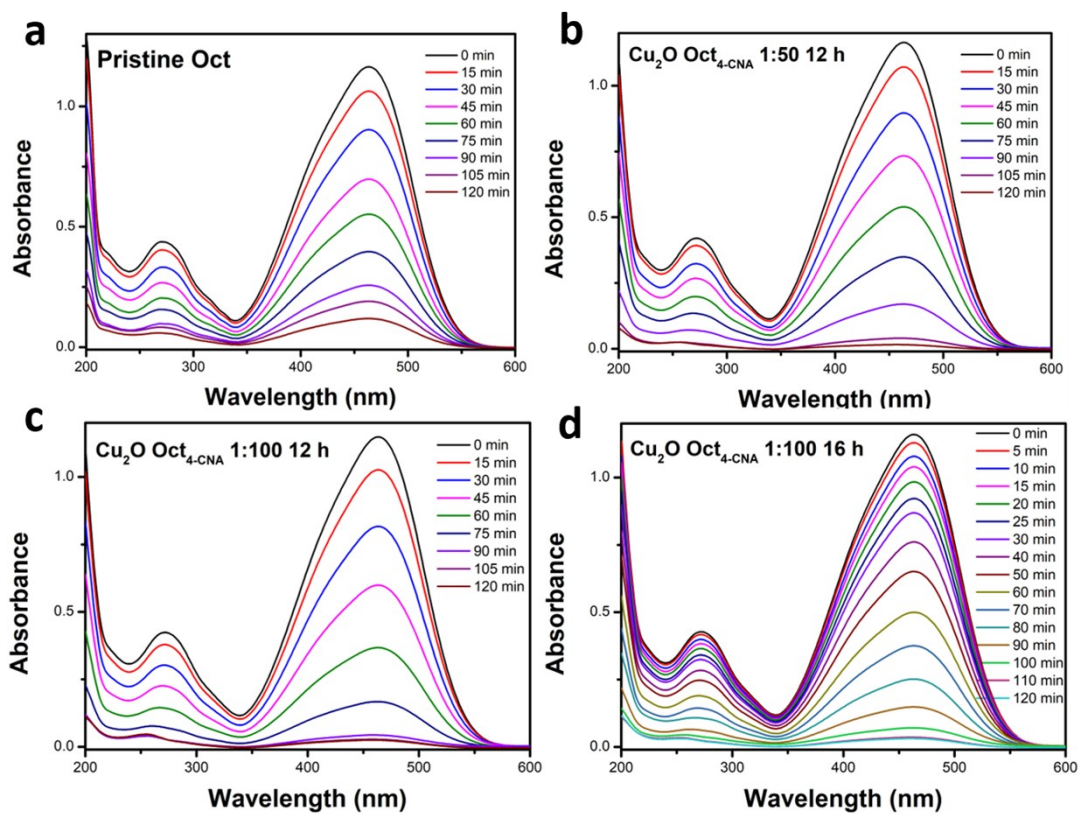

**Fig. S7** Time-dependent UV-vis spectra of methyl orange photodegraded by (a) pristine  $\text{Cu}_2\text{O}$  octahedra and (b-f)  $\text{Cu}_2\text{O}$  octahedra modified with different 4-CNA molar ratios and functionalization times.

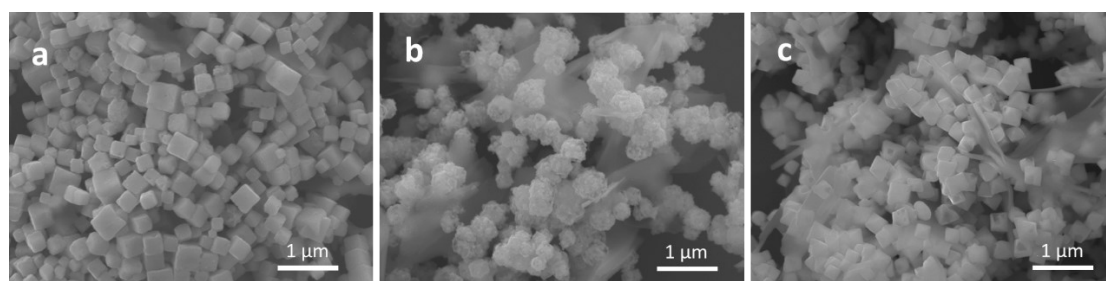

**Fig. S8** SEM images of 4-CNA-modified  $\text{Cu}_2\text{O}$  (a) cubes, (b) rhombic dodecahedra, and (c) octahedra after the photodegradation experiments.

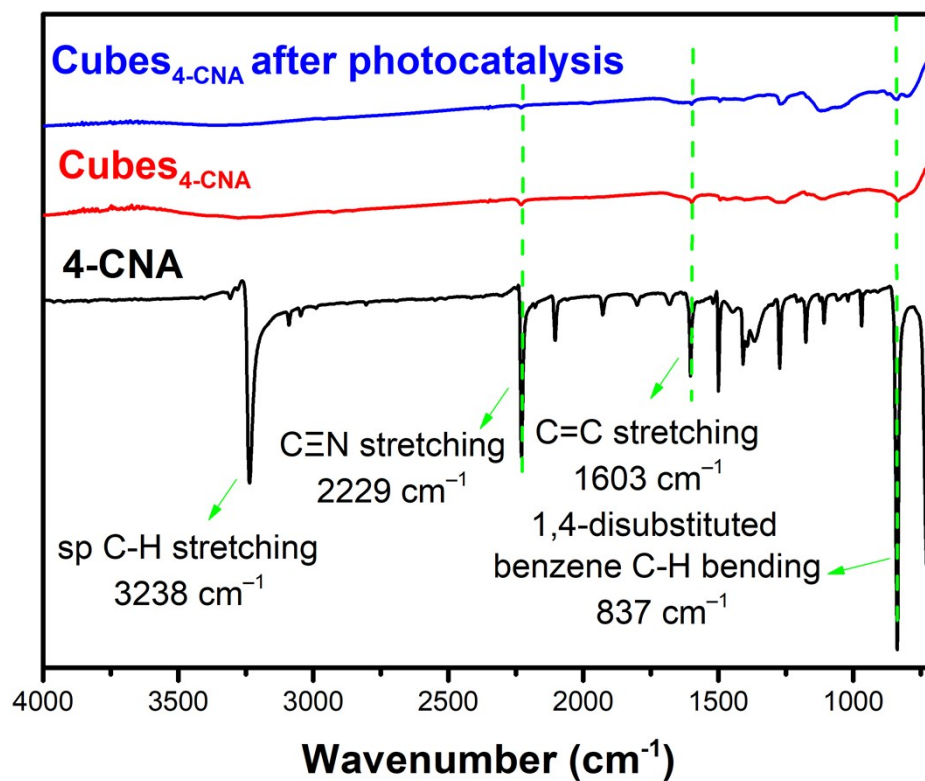

**Fig. S9** FT-IR spectra of 4-CNA and 4-CNA-modified Cu<sub>2</sub>O cubes before and after the photodegradation reaction.



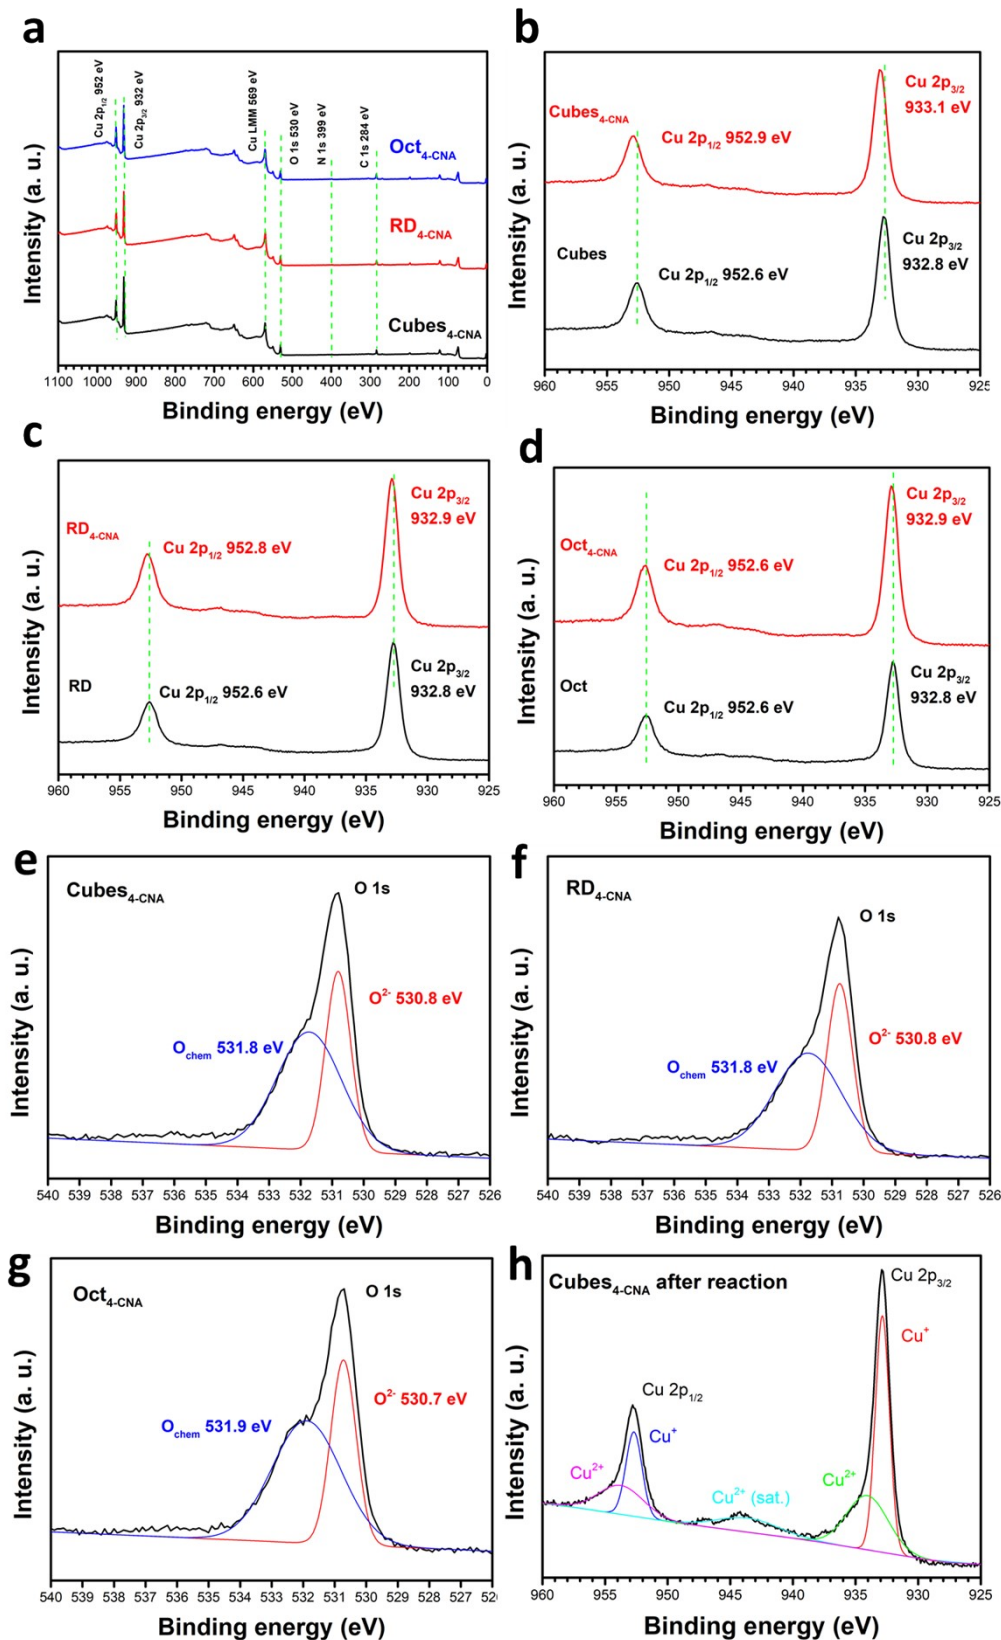

**Fig. S10** (a) Full XPS data of 4-CNA-functionalized Cu<sub>2</sub>O crystals. (b–g) XPS data of the copper and oxygen peaks before and after modification. (h) XPS data of the Cu<sub>2</sub>O cubes after the photodegradation reaction.

**Table S1** Reagent amounts used for EPR measurements.

|           | $\text{Cu}_2\text{O}$<br>(1 mg/mL) | 1 M DMPO<br>(mL) | PBS or<br>methanol<br>(mL) | Total<br>(mL) | Time<br>(min) |
|-----------|------------------------------------|------------------|----------------------------|---------------|---------------|
| Cubes     | 0.1                                | 0.1              | 0.8                        | 1.0           | 2             |
| RD        | 0.2                                | 0.1              | 0.7                        | 1.0           | 2             |
| Octahedra | 0.5                                | 0.1              | 0.4                        | 1.0           | 2             |

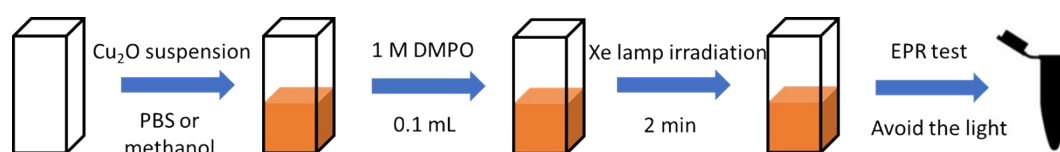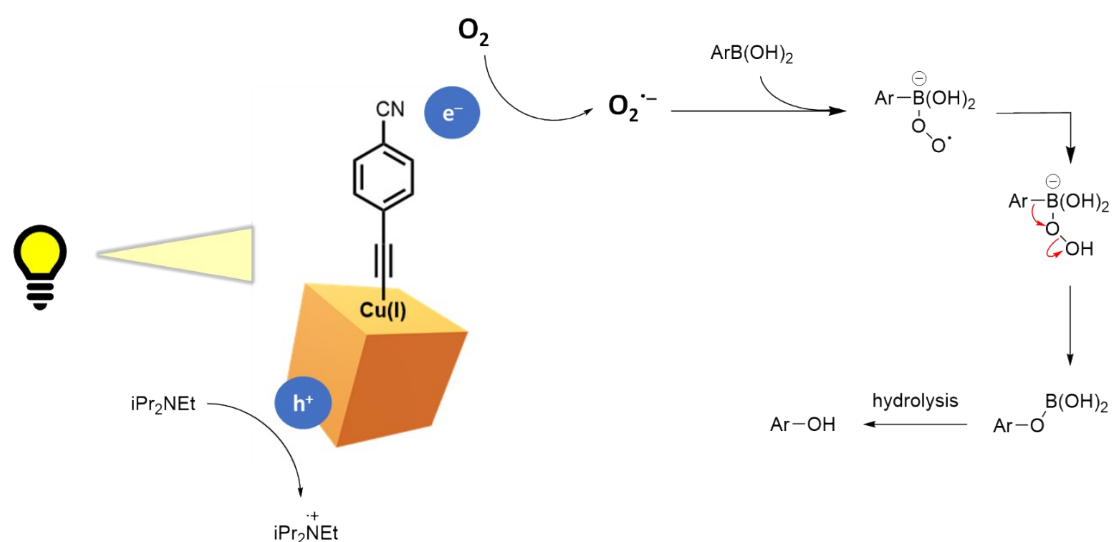

**Fig. S11** Reaction mechanism for photocatalytic hydroxylation reaction catalyzed by 4-CNA-modified  $\text{Cu}_2\text{O}$  cubes.

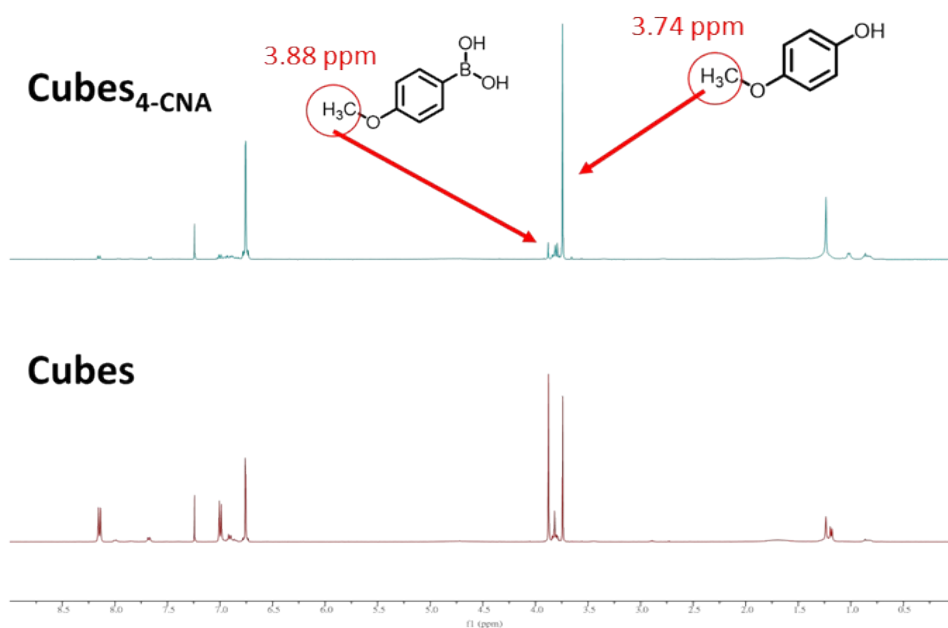

**Fig. S12** Crude  $^1\text{H}$ -NMR spectra collected after 4-methoxyphenylboronic acid hydroxylation catalyzed by  $\text{Cu}_2\text{O}$  cubes and 4-CNA-modified  $\text{Cu}_2\text{O}$  cubes.

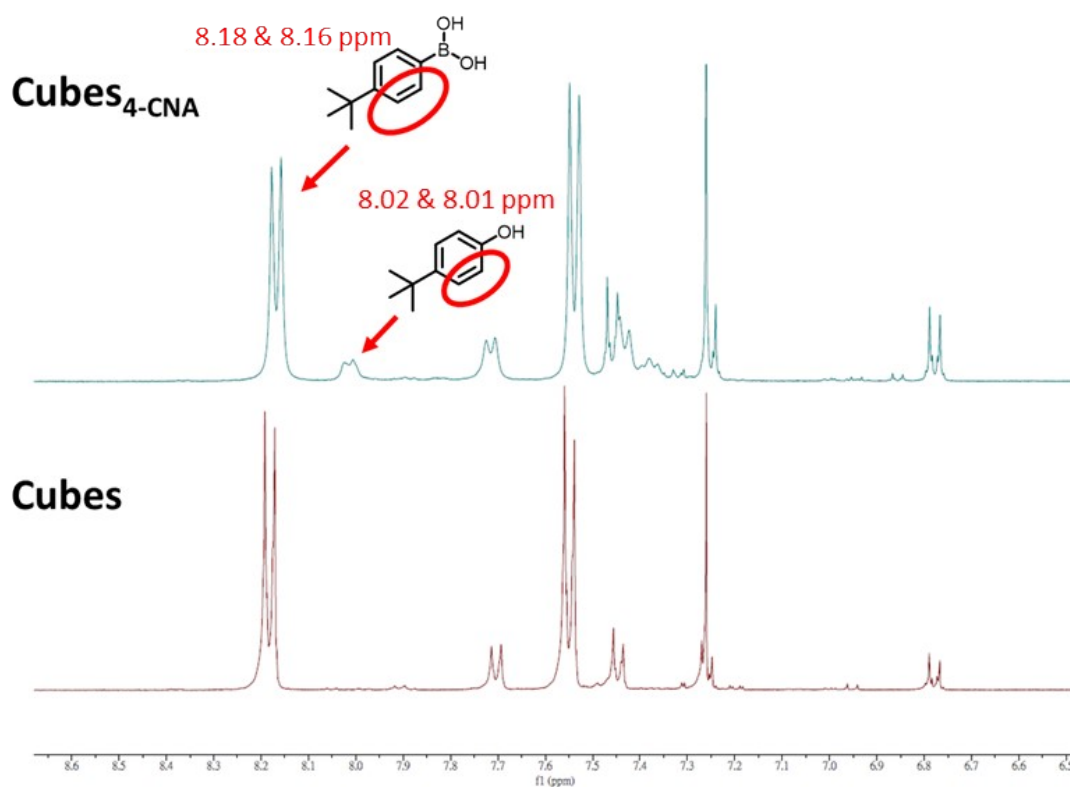

**Fig. S13** Crude  $^1\text{H}$ -NMR spectra collected after 4-tert-butylphenylboronic acid hydroxylation catalyzed by  $\text{Cu}_2\text{O}$  cubes and 4-CNA-modified  $\text{Cu}_2\text{O}$  cubes.

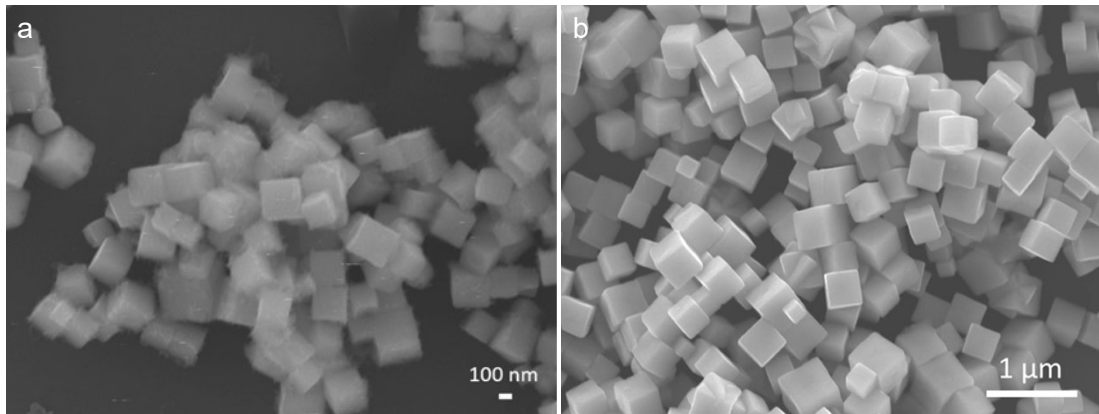

**Fig. S14** SEM image of pristine Cu<sub>2</sub>O cubes after photocatalytic hydroxylation of (a) 4-methoxyphenylboronic acid and (b) 4-tert-butylphenylboronic acid.

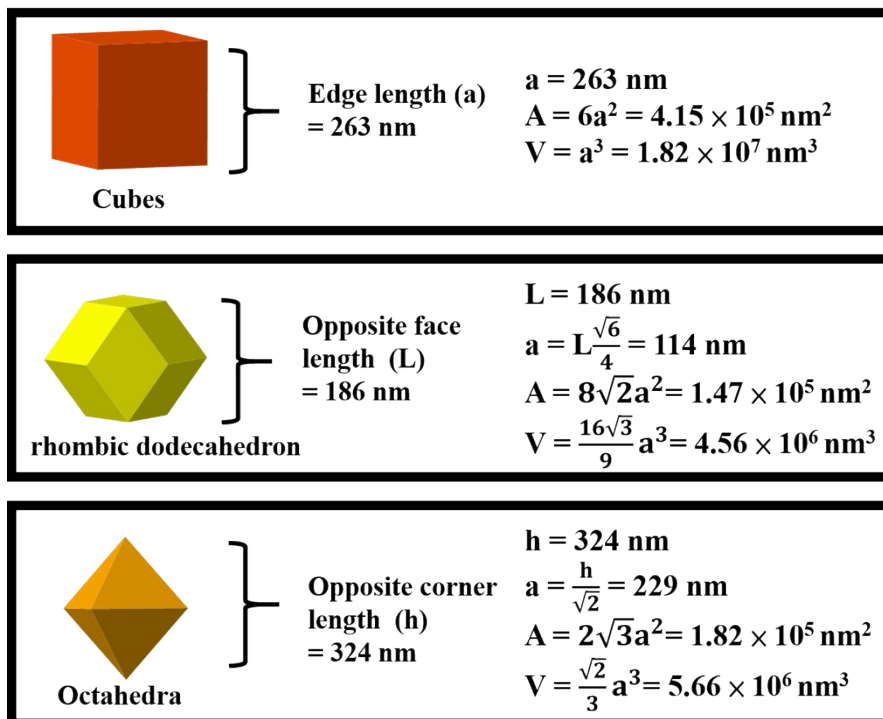

**Fig. S15** Calculations of surface areas and volumes of different Cu<sub>2</sub>O crystals.

**Table S2** Calculations 4-CNA weights needed for Cu<sub>2</sub>O surface functionalization.

|                                                    | Cubes                    | RD                       | Octahedra                |
|----------------------------------------------------|--------------------------|--------------------------|--------------------------|
| Size (nm)                                          | 263                      | 186                      | 324                      |
| Density of Cu <sub>2</sub> O (mg/nm <sup>3</sup> ) | 6.03 × 10 <sup>-18</sup> |                          |                          |
| Weight of one particle (mg)                        | 1.09 × 10 <sup>-10</sup> | 2.74 × 10 <sup>-11</sup> | 3.40 × 10 <sup>-11</sup> |
| Weight of Cu <sub>2</sub> O (mg)                   | 10                       |                          |                          |
| Number of particles                                | 9.16 × 10 <sup>10</sup>  | 3.65 × 10 <sup>11</sup>  | 2.94 × 10 <sup>11</sup>  |
| Total surface area (m <sup>2</sup> )               | 3.80 × 10 <sup>16</sup>  | 5.37 × 10 <sup>16</sup>  | 5.35 × 10 <sup>16</sup>  |
| Surface Cu atom density (nm <sup>-1</sup> )        | 10.98                    | 7.76                     | 14.27                    |
| Number of surface Cu atoms                         | 4.17 × 10 <sup>17</sup>  | 4.17 × 10 <sup>17</sup>  | 7.63 × 10 <sup>17</sup>  |
| Weight of 4-CNA (mg) (Cu:4-CNA = 1:50)             | 4.4                      | 4.4                      | 8.1                      |
| Weight of K <sub>2</sub> CO <sub>3</sub> (mg)      | 4.8                      | 4.8                      | 8.8                      |
| Weight of 4-CNA (mg) (Cu:4-CNA = 1:100)            | 8.8                      | 8.8                      | 16.1                     |
| Weight of K <sub>2</sub> CO <sub>3</sub> (mg)      | 9.6                      | 9.6                      | 17.5                     |

**Table S3** Determination of particle weights for the photodegradation experiment.

|                                                    | Cubes                    | RD                       | Octahedra                |
|----------------------------------------------------|--------------------------|--------------------------|--------------------------|
| Size (nm)                                          | 263                      | 186                      | 324                      |
| Surface area for one particle (nm <sup>2</sup> )   | 4.15 × 10 <sup>5</sup>   | 1.47 × 10 <sup>5</sup>   | 1.82 × 10 <sup>5</sup>   |
| Volume for one particle (nm <sup>3</sup> )         | 1.82 × 10 <sup>7</sup>   | 4.56 × 10 <sup>6</sup>   | 5.66 × 10 <sup>6</sup>   |
| Fixed surface area (m <sup>2</sup> )               | 0.03                     |                          |                          |
| Number of particles                                | 7.22 × 10 <sup>10</sup>  | 2.04 × 10 <sup>11</sup>  | 1.65 × 10 <sup>11</sup>  |
| Density of Cu <sub>2</sub> O (mg/nm <sup>3</sup> ) | 6.03 × 10 <sup>-18</sup> |                          |                          |
| Weight of one particle (mg)                        | 1.09 × 10 <sup>-10</sup> | 2.74 × 10 <sup>-11</sup> | 3.40 × 10 <sup>-11</sup> |
| Weight (mg)                                        | 7.9                      | 5.6                      | 5.6                      |
